# Supplementary material for: Disrupted microglial iron homeostasis in progressive multiple sclerosis
Source: bioRxiv or medRxiv preprint supplement (doi:10.1101/2021.05.09.443127), 2021-07-09
Supplement: Supplementary file [file media-1.pdf]

| Status | Patient ID | Age (yrs) | Sex | PMI (hours) |
|--------|------------|-----------|-----|-------------|
| CTL    | A306       | 65        | F   | 7           |
| CTL    | A337       | 86        | F   | 29          |
| CTL    | A368       | 65        | M   | 11          |
| CTL    | 4514       | 66        | M   | 17.3        |
| CTL    | A168       | 69        | F   | 19          |
| CTL    | 4621       | 83        | F   | 17.6        |
| CTL    | 5214       | 61        | M   | 19.5        |
| CTL    | 4823       | 35        | F   | 11.3        |
| SPMS   | 4605       | 62        | F   | 11.8        |
| SPMS   | 5308       | 54        | F   | 9.3         |
| SPMS   | 5053       | 59        | M   | 24.9        |
| SPMS   | 56         | 59        | F   | 5.08        |
| SPMS   | 130        | 40        | F   | 5.25        |
| SPMS   | 149        | 61        | F   | 3           |
| SPMS   | 4959       | 47        | F   | UNK         |

**Table 1.** Age, sex, and post-mortem interval (PMI) for samples used for sNuc-seq. CTL, control; SPMS, secondary progressive MS; F, female; M, male; UNK, unknown/data missing.

| Astrocyte (21 genes)                                                                                                                                                                              | Microglia (22 genes)                                                                                                                                                                                       | Neuron (19 genes)                                                                                                                                                                     | Oligodendrocyte (20 genes)                                                                                                                                                                       | OPC (13 genes)                                                                                                              |
|---------------------------------------------------------------------------------------------------------------------------------------------------------------------------------------------------|------------------------------------------------------------------------------------------------------------------------------------------------------------------------------------------------------------|---------------------------------------------------------------------------------------------------------------------------------------------------------------------------------------|--------------------------------------------------------------------------------------------------------------------------------------------------------------------------------------------------|-----------------------------------------------------------------------------------------------------------------------------|
| ADGRV1<br>ANGPTL4<br>APOE<br>AQP4<br>CHI3L1<br>CLU<br>COL5A3<br>CST3<br>DPP10<br>DTNA<br>GFAP<br>GLIS3<br>GPC5<br>GPM6A<br>MGST1<br>RFX4<br>RNF219-AS1<br>SLC14A1<br>SLC1A2<br>SPARCL1<br>TPD52L1 | ADAM28<br>APBB1IP<br>ARHGAP24<br>C10ORF11<br>C1QB<br>C1QC<br>CD74<br>DOCK8<br>FYB<br>INPP5D<br>LPAR6<br>MEF2A<br>P2RY12<br>PLXDC2<br>PTPRC<br>RGS1<br>RP11-624C23.1<br>SFMBT2<br>SRGN<br>ST6GAL1<br>TBXAS1 | CCK<br>CDH9<br>CHRM3<br>CNTN5<br>CNTNAP2<br>GABRB2<br>GALNTL6<br>GRIK2<br>GRIN2A<br>KCNC2<br>KCNQ5<br>MEG3<br>RBFOX1<br>ROBO2<br>RP11-123O10.4<br>SNAP25<br>SYNPR<br>TENM2<br>ZNF385D | APLP1<br>CLDN11<br>CNP<br>CTNNA3<br>ENPP2<br>LINC01608<br>LURAP1L-AS1<br>MAN2A1<br>MOBP<br>MOG<br>PIP4K2A<br>PLCL1<br>RNF220<br>SEPP1<br>SLC44A1<br>SLC5A11<br>ST18<br>TMEM144<br>TMTC2<br>TTLL7 | BRINP3<br>DSCAM<br>LHFPL3<br>LRRC4C<br>LUZP2<br>MEGF11<br>MMP16<br>NOVA1<br>PTPRZ1<br>RP4-668E10.4<br>SEMA5A<br>TNR<br>VCAN |

**Table 2.** Core gene signatures used for annotation of astrocytes, microglia, neurons, oligodendrocytes, and oligodendrocyte progenitor cells (OPC).

| Status | Brain ID    | Sex |
|--------|-------------|-----|
| CTL    | 4307        | M   |
| CTL    | 4823        | F   |
| CTL    | 5214        | M   |
| CTL    | 4621        | F   |
| CTL    | 4514        | M   |
| CTL    | A168 8-1    | F   |
| CTL    | A0212 12-4  | M   |
| SPMS   | 5252/Sec8   | F   |
| SPMS   | 5053        | M   |
| SPMS   | 4605        | F   |
| SPMS   | 4399/Sec5   | M   |
| SPMS   | MS137 4-IRT | F   |
| SPMS   | 4732/Sec7   | F   |
| SPMS   | 5276        | F   |
| PPMS   | 4961        | F   |
| PPMS   | 4951        | F   |
| PPMS   | 2485        | M   |
| PPMS   | 5149        | M   |
| PPMS   | 3816        | F   |
| RRMS   | 5095        | M   |
| RRMS   | 505         | F   |
| RRMS   | 5154        | M   |
| RRMS   | 5139        | M   |
| RRMS   | 5102        | F   |
| RRMS   | 5123        | F   |

**Table 3.** Samples used for bulk RNA-sequencing. CTL, control; SPMS, secondary progressive MS; PPMS, primary progressive MS; RRMS, relapsing-remitting MS.

| ID                          | Platform | Case.Disease                             |
|-----------------------------|----------|------------------------------------------|
| GSE36980.GPL6244.test3      | GPL6244  | Alzheimer's disease (AD)                 |
| GSE48350.GPL570.test2       | GPL570   | Alzheimer's disease (AD)                 |
| GSE48350.GPL570.test3       | GPL570   | Alzheimer's disease (AD)                 |
| GSE8397.GPL96.test1         | GPL96    | Parkinson's disease (PD)                 |
| GSE36980.GPL6244.test2      | GPL6244  | Alzheimer's disease (AD)                 |
| GSE48350.GPL570.test4       | GPL570   | Alzheimer's disease (AD)                 |
| GSE13162.GPL571.test2       | GPL571   | frontotemporal lobar degeneration (FTLD) |
| GSE84422.GPL570.test2       | GPL570   | Alzheimer's disease (AD)                 |
| E-MEXP-2280.A-AFFY-44.test2 | AFFY-44  | frontotemporal lobar degeneration (FTLD) |
| GSE84422.GPL570.test1       | GPL570   | Alzheimer's disease (AD)                 |
| GSE13162.GPL571.test3       | GPL571   | frontotemporal lobar degeneration (FTLD) |
| GSE39420.GPL11532.test1     | GPL11532 | Alzheimer's disease (AD)                 |
| GSE28146.GPL570.test1       | GPL570   | Alzheimer's disease (AD)                 |
| GSE7621.GPL570.test1        | GPL570   | Parkinson's disease (PD)                 |
| GSE84422.GPL96.test9        | GPL96    | Alzheimer's disease (AD)                 |
| GSE20164.GPL96.test1        | GPL96    | Parkinson's disease (PD)                 |
| E-MEXP-2280.A-AFFY-44.test4 | AFFY-44  | frontotemporal lobar degeneration (FTLD) |
| GSE13162.GPL571.test5       | GPL571   | frontotemporal lobar degeneration (FTLD) |
| GSE84422.GPL96.test8        | GPL96    | Alzheimer's disease (AD)                 |
| GSE49036.GPL570.test3       | GPL570   | Parkinson's disease (PD)                 |
| GSE84422.GPL96.test17       | GPL96    | Alzheimer's disease (AD)                 |
| GSE28146.GPL570.test3       | GPL570   | Alzheimer's disease (AD)                 |
| E-MEXP-2280.A-AFFY-44.test1 | AFFY-44  | Alzheimer's disease (AD)                 |
| GSE54562.GPL6947.test1      | GPL6947  | major depressive disorder                |
| GSE49036.GPL570.test2       | GPL570   | Parkinson's disease (PD)                 |
| GSE1297.GPL96.test1         | GPL96    | Alzheimer's disease (AD)                 |
| GSE39420.GPL11532.test2     | GPL11532 | Alzheimer's disease (AD)                 |
| GSE8397.GPL96.test3         | GPL96    | Parkinson's disease (PD)                 |
| GSE29378.GPL6947.test2      | GPL6947  | Alzheimer's disease (AD)                 |
| GSE5389.GPL96.test3         | GPL96    | bipolar disorder                         |
| GSE13162.GPL571.test1       | GPL571   | frontotemporal lobar degeneration (FTLD) |
| GSE44593.GPL570.test1       | GPL570   | major depressive disorder                |
| GSE28146.GPL570.test2       | GPL570   | Alzheimer's disease (AD)                 |
| GSE36980.GPL6244.test1      | GPL6244  | Alzheimer's disease (AD)                 |
| GSE54566.GPL570.test1       | GPL570   | major depressive disorder                |

**Table 4.** Studies used for GSVA analysis.
